# Supplementary material for: Estimating clinical severity of COVID-19 from the transmission dynamics in Wuhan, China
Source: Springer Nature journal article supplement (doi:10.1038/s41591-020-0822-7), 2020-03-19
Supplement: 41591_2020_822_MOESM1_ESM.pdf [file 41591_2020_822_MOESM1_ESM.pdf]

In the format provided by the authors and unedited.

# Estimating clinical severity of COVID-19 from the transmission dynamics in Wuhan, China

Joseph T. Wu <sup>1,3</sup> , Kathy Leung<sup>1,3</sup>, Mary Bushman<sup>2</sup>, Nishant Kishore<sup>2</sup>, Rene Niehus<sup>2</sup>, Pablo M. de Salazar<sup>2</sup>, Benjamin J. Cowling <sup>1</sup>, Marc Lipsitch<sup>2</sup> and Gabriel M. Leung<sup>1</sup>

---

<sup>1</sup>WHO Collaborating Centre for Infectious Disease Epidemiology and Control, School of Public Health, LKS Faculty of Medicine, The University of Hong Kong, Hong Kong SAR, China. <sup>2</sup>Center for Communicable Disease Dynamics, Department of Epidemiology, Harvard T.H. Chan School of Public Health, Boston, MA, USA. <sup>3</sup>These authors contributed equally: Joseph T. Wu, Kathy Leung. e-mail: [joewu@hku.hk](mailto:joewu@hku.hk)

**Supplementary Table 1. The number of confirmed cases of COVID-19 in Wuhan with no epidemiologic link to Huanan Seafood Wholesale Market between 1 Dec 2019 and 3 Jan 2020**

| <b>Date</b> | <b>No. of confirmed cases with no epidemiologic link to Huanan Market</b> |
|-------------|---------------------------------------------------------------------------|
| 12/10/2019  | 1                                                                         |
| 12/11/2019  | 0                                                                         |
| 12/12/2019  | 0                                                                         |
| 12/13/2019  | 0                                                                         |
| 12/14/2019  | 1                                                                         |
| 12/15/2019  | 2                                                                         |
| 12/16/2019  | 2                                                                         |
| 12/17/2019  | 0                                                                         |
| 12/18/2019  | 0                                                                         |
| 12/19/2019  | 0                                                                         |
| 12/20/2019  | 1                                                                         |
| 12/21/2019  | 1                                                                         |
| 12/22/2019  | 2                                                                         |
| 12/23/2019  | 1                                                                         |
| 12/24/2019  | 0                                                                         |
| 12/25/2019  | 2                                                                         |
| 12/26/2019  | 0                                                                         |
| 12/27/2019  | 0                                                                         |
| 12/28/2019  | 1                                                                         |
| 12/29/2019  | 4                                                                         |
| 12/30/2019  | 3                                                                         |
| 12/31/2019  | 1                                                                         |
| 1/1/2020    | 6                                                                         |
| 1/2/2020    | 6                                                                         |
| 1/3/2020    | 10                                                                        |

**Supplementary Table 2. The details of cases exported from Wuhan to cities outside mainland China\* via air travel on each day between 25 December 2019 and 19 January 2020**

| Country/region | City           | Sex | Age | Date of arrival | Date of symptom onset | Date of confirmation |
|----------------|----------------|-----|-----|-----------------|-----------------------|----------------------|
| Thailand       | Bangkok        | F   | 61  | 1/8/2020        | 1/5/2020              | 1/12/2020            |
| Thailand       | Bangkok        | F   | 74  | 1/13/2020       | 1/5/2020              | 1/17/2020            |
| Thailand       | Bangkok        | M   | 68  | 1/19/2020       | 1/19/2020             | 1/19/2020            |
| Thailand       | Nakhon Pathom  | F   | 73  | 1/1/2020        | 12/31/2019            | 1/22/2020            |
| Vietnam        | Hanoi          | M   | 66  | 1/13/2020       | 1/17/2020             | 1/23/2020            |
| Japan          | Kanagawa       | M   | 35  | 1/6/2020        | 1/3/2020              | 1/15/2020            |
| Japan          | Tokyo          | M   | 40+ | 1/19/2020       | 1/14/2020             | 1/24/2020            |
| Japan          | Tokyo          | F   | 30+ | 1/18/2020       | 1/21/2020             | 1/25/2020            |
| Singapore      | Singapore      | M   | 56  | 1/19/2020       | 1/25/2020             | 1/28/2020            |
| Singapore      | Singapore      | F   | 56  | 1/18/2020       | -                     | 1/27/2020            |
| South Korea    | Seoul          | F   | 35  | 1/19/2020       | 1/17/2020             | 1/20/2020            |
| United States  | Snohomish      | M   | 30+ | 1/15/2020       | 1/19/2020             | 1/20/2020            |
| United States  | Chicago        | F   | 60  | 1/13/2020       | 1/22/2020             | 1/24/2020            |
| France         | Paris          | M   | 31  | 1/18/2020       | 1/19/2020             | 1/25/2020            |
| France         | Paris          | F   | 30  | 1/18/2020       | 1/23/2020             | 1/25/2020            |
| Nepal          | Kathmandu      | M   | 32  | 1/5/2020        | 1/13/2020             | 1/24/2020            |
| Australia      | Sydney         | M   | 43  | 1/19/2020       | 1/20/2020             | 1/25/2020            |
| Australia      | Sydney         | M   | 35  | 1/6/2020        | 1/7/2020              | 1/25/2020            |
| Australia      | Melbourne      | M   | 50+ | 1/19/2020       | 1/23/2020             | 1/25/2020            |
| Sri Lanka      | Colombo        | F   | 43  | 1/19/2020       | 1/25/2020             | 1/27/2020            |
| Taiwan         | Central Taiwan | M   | 40+ | 1/12/2020       | 1/21/2020             | 1/31/2020            |

\* Cases reported in Hong Kong and Macau were not included in the estimation of outbreak size because most of the patients transit in Shenzhen/Zhuhai before coming to Hong Kong or Macau.

**Supplementary Table 3. The number of passengers and confirmed cases who returned to their countries from Wuhan on chartered flights between 29 January and 4 February 2020\***

| <b>Country or region</b> | <b>Date of arrival</b> | <b>Number of passengers</b> | <b>Number of confirmed cases</b> | <b>Number of asymptomatic cases</b> |
|--------------------------|------------------------|-----------------------------|----------------------------------|-------------------------------------|
| Japan                    | 1/29/2020              | 206                         | 4                                | 1                                   |
| United States            | 1/29/2020              | 201                         | 0                                | -                                   |
| Japan                    | 1/30/2020              | 210                         | 3                                | 2                                   |
| Singapore                | 1/30/2020              | 92                          | 4                                | 2                                   |
| Portugal                 | 1/30/2020              | 350                         | 0                                | -                                   |
| France                   | 1/31/2020              | 200                         | 0                                | -                                   |
| Japan                    | 1/31/2020              | 149                         | 2                                | 1                                   |
| South Korea              | 1/31/2020              | 368                         | 1                                | 1                                   |
| United Kingdom           | 1/31/2020              | 110                         | 0                                | -                                   |
| Germany                  | 2/1/2020               | 124                         | 2                                | 2                                   |
| South Korea              | 2/1/2020               | 333                         | 1                                | 0                                   |
| Turkey                   | 2/1/2020               | 42                          | 0                                | -                                   |
| Indonesia                | 2/1/2020               | 250                         | 0                                | -                                   |
| Bangladesh               | 2/1/2020               | 316                         | 0                                | -                                   |
| Sri Lanka                | 2/1/2020               | 33                          | 0                                | -                                   |
| India                    | 2/1/2020               | 324                         | 0                                | -                                   |
| France                   | 2/2/2020               | 254                         | 0                                | -                                   |
| United Kingdom           | 2/2/2020               | 11                          | 0                                | -                                   |
| Ukraine                  | 2/2/2020               | 128                         | 0                                | -                                   |
| Belgium                  | 2/2/2020               | 9                           | 1                                | 1                                   |
| Saudi Arabia             | 2/2/2020               | 10                          | 0                                | -                                   |
| Kazakhstan               | 2/2/2020               | 83                          | 0                                | -                                   |
| Morocco                  | 2/2/2020               | 167                         | 0                                | -                                   |
| Australia                | 2/3/2020               | 243                         | 0                                | -                                   |
| Taiwan                   | 2/3/2020               | 247                         | 1                                | -                                   |
| Italy                    | 2/3/2020               | 56                          | 1                                | -                                   |
| Malaysia                 | 2/4/2020               | 107                         | 2                                | 2                                   |
| Thailand                 | 2/4/2020               | 138                         | 1                                | -                                   |

\* Japan, Singapore, South Korea, Germany, Belgium and Malaysia had tested all the passengers and a few pre-symptomatic or asymptomatic cases were confirmed. For other countries, it is unknown whether they had tested all the passengers or only those showing symptoms.

**Supplementary Table 4. The age distribution of confirmed cases of COVID-19 in Wuhan, Hubei and mainland China**

| <b>Age</b> | <b>Wuhan</b> | <b>Hubei</b> | <b>Mainland China</b> |
|------------|--------------|--------------|-----------------------|
| 0-9        | 0.4%         | 0.4%         | 0.9%                  |
| 10-19      | 0.4%         | 0.7%         | 1.2%                  |
| 20-29      | 4.5%         | 6.6%         | 8.1%                  |
| 30-39      | 13.1%        | 15.4%        | 17.0%                 |
| 40-49      | 15.6%        | 18.3%        | 19.2%                 |
| 50-59      | 22.0%        | 23.4%        | 22.4%                 |
| 60-69      | 26.5%        | 21.4%        | 19.2%                 |
| 70-79      | 12.6%        | 10.1%        | 8.8%                  |
| 80-89      | 4.5%         | 3.3%         | 2.9%                  |
| ≥ 90       | 0.5%         | 0.3%         | 0.3%                  |

**Supplementary Table 5. The age distribution of confirmed death cases of COVID-19 in mainland China**

| <b>Age</b> | <b>No. fatal cases</b> | <b>Proportion of fatal cases</b> |
|------------|------------------------|----------------------------------|
| 0-9        | 0                      | 0%                               |
| 10-19      | 1                      | 0.1%                             |
| 20-29      | 7                      | 0.7%                             |
| 30-39      | 18                     | 1.8%                             |
| 40-49      | 38                     | 3.7%                             |
| 50-59      | 130                    | 12.7%                            |
| 60-69      | 309                    | 30.2%                            |
| 70-79      | 312                    | 30.5%                            |
| ≥ 80       | 208                    | 20.3%                            |

**Supplementary Table 6. The daily number of laboratory-confirmed cases and deaths of COVID-19 in Wuhan up to 25 February 2020**

| <b>Date</b> | <b>Cumulative no. of cases</b> | <b>Cumulative no. of deaths</b> |
|-------------|--------------------------------|---------------------------------|
| 12/31/2019  | 27                             | 0                               |
| 1/3/2020    | 44                             | 0                               |
| 1/5/2020    | 59                             | 0                               |
| 1/8/2020    | 59                             | 0                               |
| 1/10/2020   | 41                             | 0                               |
| 1/11/2020   | 41                             | 1                               |
| 1/12/2020   | 41                             | 1                               |
| 1/13/2020   | 41                             | 1                               |
| 1/14/2020   | 41                             | 1                               |
| 1/15/2020   | 41                             | 1                               |
| 1/16/2020   | 45                             | 2                               |
| 1/17/2020   | 62                             | 2                               |
| 1/18/2020   | 121                            | 3                               |
| 1/19/2020   | 198                            | 4                               |
| 1/20/2020   | 258                            | 6                               |
| 1/21/2020   | 365                            | 9                               |
| 1/22/2020   | 425                            | 17                              |
| 1/23/2020   | 495                            | 25                              |
| 1/24/2020   | 572                            | 38                              |
| 1/25/2020   | 618                            | 45                              |
| 1/26/2020   | 698                            | 63                              |
| 1/27/2020   | 1590                           | 85                              |
| 1/28/2020   | 1905                           | 104                             |
| 1/29/2020   | 2261                           | 129                             |
| 1/30/2020   | 2639                           | 159                             |
| 1/31/2020   | 3215                           | 192                             |
| 2/1/2020    | 4109                           | 224                             |
| 2/2/2020    | 5142                           | 265                             |
| 2/3/2020    | 6384                           | 313                             |
| 2/4/2020    | 8351                           | 362                             |
| 2/5/2020    | 10117                          | 414                             |
| 2/6/2020    | 11618                          | 478                             |
| 2/7/2020    | 13603                          | 545                             |
| 2/8/2020    | 14982                          | 608                             |
| 2/9/2020    | 16902                          | 681                             |
| 2/10/2020   | 18454                          | 748                             |
| 2/11/2020   | 19558                          | 820                             |
| 2/12/2020   | 32994                          | 1036                            |
| 2/13/2020   | 35991                          | 1080                            |
| 2/14/2020   | 37914                          | 1123                            |

|           |       |      |
|-----------|-------|------|
| 2/15/2020 | 39462 | 1233 |
| 2/16/2020 | 41152 | 1309 |
| 2/17/2020 | 42752 | 1381 |
| 2/18/2020 | 44412 | 1497 |
| 2/19/2020 | 45027 | 1585 |
| 2/20/2020 | 45346 | 1684 |
| 2/21/2020 | 45660 | 1774 |
| 2/22/2020 | 46201 | 1856 |
| 2/23/2020 | 46607 | 1987 |
| 2/24/2020 | 47071 | 2043 |
| 2/25/2020 | 47441 | 2085 |



**Supplementary Table 7. The time between onset and death or the time between admission and death for 41 death cases of COVID-19 in Wuhan**

| Sex | Age | Date of symptom onset | Date of first admission | Death date | Time between onset to death | Time between admission to death |
|-----|-----|-----------------------|-------------------------|------------|-----------------------------|---------------------------------|
| M   | 61  | 12/20/2019            | 12/27/2019              | 1/9/2020   | 20                          | 13                              |
| M   | 69  | 12/25/2019            | 12/31/2019              | 1/15/2020  | 21                          | 15                              |
| M   | 89  | 1/5/2020              | 1/8/2020                | 1/18/2020  | 13                          | 10                              |
| M   | 89  | 1/13/2020             | 1/13/2020               | 1/19/2020  | 6                           | 6                               |
| M   | 75  | 1/4/2020              | 1/11/2020               | 1/20/2020  | 16                          | 9                               |
| F   | 69  |                       | 1/14/2020               | 1/20/2020  |                             | 6                               |
| M   | 66  | 1/10/2020             | 1/16/2020               | 1/20/2020  | 10                          | 4                               |
| F   | 48  | 12/10/2019            | 12/10/2019              | 1/20/2020  | 41                          | 41                              |
| M   | 86  | 1/2/2020              | 1/9/2020                | 1/21/2020  | 19                          | 12                              |
| F   | 85  |                       | 11/26/2019              | 1/21/2020  |                             | 56                              |
| M   | 82  | 1/9/2020              | 1/14/2020               | 1/21/2020  | 12                          | 7                               |
| M   | 81  | 1/9/2020              | 1/13/2020               | 1/21/2020  | 12                          | 8                               |
| F   | 70  |                       | 1/13/2020               | 1/21/2020  |                             | 8                               |
| F   | 66  | 1/8/2020              | 1/19/2020               | 1/21/2020  | 13                          | 2                               |
| M   | 66  | 12/22/2019            | 12/22/2019              | 1/21/2020  | 30                          | 30                              |
| M   | 66  |                       | 1/11/2020               | 1/21/2020  |                             | 10                              |
| M   | 65  | 1/5/2020              | 1/11/2020               | 1/21/2020  | 16                          | 10                              |
| M   | 53  |                       | 1/13/2020               | 1/21/2020  |                             | 8                               |
| M   | 84  | 1/6/2020              | 1/9/2020                | 1/22/2020  | 16                          | 13                              |
| F   | 82  | 1/3/2020              | 1/3/2020                | 1/22/2020  | 19                          | 19                              |
| M   | 81  |                       | 1/18/2020               | 1/22/2020  |                             | 4                               |
| F   | 80  |                       | 1/11/2020               | 1/22/2020  |                             | 11                              |
| M   | 73  | 12/30/2019            | 1/5/2020                | 1/22/2020  | 23                          | 17                              |
| F   | 70  |                       | 1/18/2020               | 1/22/2020  |                             | 4                               |
| M   | 87  | 1/12/2020             | 1/19/2020               | 1/23/2020  | 11                          | 4                               |
| F   | 82  | 1/10/2020             | 1/17/2020               | 1/23/2020  | 13                          | 6                               |
| M   | 72  | 1/11/2020             | 1/18/2020               | 1/23/2020  | 12                          | 5                               |
| M   | 70  | 1/15/2020             | 1/19/2020               | 1/23/2020  | 8                           | 4                               |
| F   | 67  | 1/10/2020             | 1/12/2020               | 1/24/2020  | 14                          | 12                              |
| M   | 65  | 1/12/2020             | 1/16/2020               | 1/23/2020  | 11                          | 7                               |
| M   | 58  | 1/1/2020              | 1/1/2020                | 1/24/2020  | 23                          | 23                              |
| M   | 36  | 1/6/2020              | 1/9/2020                | 1/23/2020  | 17                          | 14                              |
| M   | 79  | 1/11/2020             | 1/17/2020               | 1/24/2020  | 13                          | 7                               |
| M   | 78  | 1/13/2020             | 1/23/2020               | 1/24/2020  | 11                          | 1                               |
| F   | 76  |                       | 1/5/2020                | 1/24/2020  |                             | 19                              |
| M   | 67  | 1/10/2020             | 1/15/2020               | 1/24/2020  | 14                          | 9                               |
| M   | 58  | 1/3/2020              | 1/18/2020               | 1/24/2020  | 21                          | 6                               |
| M   | 55  | 1/8/2020              | 1/19/2020               | 1/24/2020  | 16                          | 5                               |
| F   | 73  |                       | 1/23/2020               | 1/28/2020  |                             | 5                               |

|   |    |           |           |           |   |   |
|---|----|-----------|-----------|-----------|---|---|
| F | 73 |           |           | 1/26/2020 |   |   |
| F | 31 | 1/21/2020 | 1/23/2020 | 1/26/2020 | 5 | 3 |

**Supplementary Table 8. Dates of symptom onset of infector-infectee pairs**

| Region    | Age of index patient | Sex of index patient | Date of arrival of index patient | Date of onset of index patient | Age of secondary patient | Sex of secondary patient | Date of onset of secondary patient | Source of secondary patient |
|-----------|----------------------|----------------------|----------------------------------|--------------------------------|--------------------------|--------------------------|------------------------------------|-----------------------------|
| Wuhan     | 61                   | M                    |                                  | 12/20/2019                     | 57                       | F                        | 12/25/2019                         | Li et al                    |
| Wuhan     | 61                   | M                    |                                  | 12/20/2019                     | 31                       | F                        | 12/29/2019                         | Li et al                    |
| Wuhan     | 62                   | F                    |                                  | 12/27/2019                     | 64                       | M                        | 1/3/2020                           | Li et al                    |
| Wuhan     | 49                   | M                    |                                  | 12/12/2019                     | 78                       | M                        | 12/19/2019                         | Li et al                    |
| Wuhan     | 52                   | F                    |                                  | 12/21/2019                     | 25                       | F                        | 12/24/2019                         | Li et al                    |
| Huanggang | 32                   | M                    |                                  | 1/4/2020                       | 28                       | F                        | 1/11/2020                          | Li et al                    |
| Shenzhen  | 65, 66, 37, 36       | F, M, F, M           | 1/4/2020                         | 1/1/2020 - 1/4/2020            | 63                       | F                        | 1/8/2020                           | Chan et al                  |
| Chicago   | 60+                  | F                    | 1/13/2020                        | 1/22/2020 - 1/23/2020          | 60+                      | M                        | 1/28/2020                          | 6th case in US              |
| Taiwan    | 40+                  | M                    | 1/12/2020                        | 1/21/2020                      | 40+                      | F                        | 1/27/2020                          | 9th case in Taiwan          |
| Hong Kong | 73, 72               | F, M                 | 1/22/2020                        | 1/22/2020 - 1/25/2020          | 37                       | F                        | 1/28/2020                          | 11th case in Hong Kong      |
| Hong Kong | 39                   | M                    | 1/23/2020                        | 1/29/2020                      | 72                       | F                        | 2/1/2020                           | 15th case in Hong Kong      |
| Singapore | 28                   | F                    | Local infection                  | 1/29/2020                      | 45                       | M                        | 2/1/2020                           | 27th case in Singapore      |
| Singapore | 28                   | F                    | Local infection                  | 1/29/2020                      | 44                       | F                        | 2/2/2020                           | 21st case in Singapore      |
| Vietnam   | 23                   | F                    | 1/17/2020                        | 1/25/2020                      | 42                       | F                        | 1/31/2020                          | 10th case in Vietnam        |
| Vietnam   | 23                   | F                    | 1/17/2020                        | 1/25/2020                      | 49                       | F                        | 2/3/2020                           | 11th case in Vietnam        |
| Vietnam   | 23                   | F                    | 1/17/2020                        | 1/25/2020                      | 16                       | F                        | 2/3/2020                           | 12th case in Vietnam        |
| Hong Kong | 60                   | M                    | Local infection                  | 1/22/2020                      | 28                       | F                        | 1/30/2020                          | 19th case in Hong Kong      |
| Hong Kong | 60, 28               | M, F                 | Local infection                  | 1/22/2020 - 1/30/2020          | 56                       | F                        | 2/4/2020                           | 20th case in Hong Kong      |
| Malaysia  | 42                   | M                    | 1/23/2020                        | 1/29/2020                      | 40                       | F                        | 2/1/2020                           | 14th case in Malaysia       |
| Shenzhen  | 64                   | F                    | Local infection                  | 1/4/2020                       | 69                       | M                        | 1/12/2020                          | 12nd case in Shenzhen       |
| Shenzhen  | 69                   | M                    | 1/15/2020                        | 1/12/2020                      | 25                       | F                        | 1/25/2020                          | 188th case in Shenzhen      |
| Shenzhen  | 64, 71               | F, M                 | 1/12/2020                        | 1/12/2020 - 1/15/2020          | 38                       | F                        | 1/22/2020                          | 39th case in Shenzhen       |
| Shenzhen  | 73                   | M                    | 1/19/2020                        | 1/20/2020                      | 49                       | M                        | 1/24/2020                          | 68th case in Shenzhen       |
| Shenzhen  | 73                   | M                    | 1/19/2020                        | 1/20/2020                      | 49                       | F                        | 1/22/2020                          | 69th case in Shenzhen       |
| Shenzhen  | 62                   | F                    | 1/22/2020                        | 1/19/2020                      | 43                       | F                        | 2/4/2020                           | 320th case in Shenzhen      |
| Shenzhen  | 30                   | F                    | 1/21/2020                        | 1/22/2020                      | 38                       | F                        | 1/28/2020                          | 108th case in Shenzhen      |
| Shenzhen  | 61                   | M                    | 1/22/2020                        | 1/24/2020                      | 35                       | F                        | 1/26/2020                          | 120th case in Shenzhen      |

|          |            |         |                 |                       |    |   |           |                        |
|----------|------------|---------|-----------------|-----------------------|----|---|-----------|------------------------|
| Shenzhen | 61         | M       | 1/22/2020       | 1/24/2020             | 39 | M | 1/26/2020 | 121st case in Shenzhen |
| Shenzhen | 61, 35, 39 | M, F, M | 1/24/2020       | 1/24/2020 - 1/26/2020 | 2  | M | 2/5/2020  | 327th case in Shenzhen |
| Shenzhen | 61, 35, 39 | M, F, M | 1/22/2020       | 1/24/2020 - 1/26/2020 | 62 | F | 2/5/2020  | 345th case in Shenzhen |
| Shenzhen | 64         | F       | 1/22/2020       | 1/17/2020             | 37 | F | 1/28/2020 | 275th case in Shenzhen |
| Shenzhen | 34         | M       | 1/20/2020       | 1/20/2020             | 32 | M | 1/23/2020 | 100th case in Shenzhen |
| Shenzhen | 34         | M       | 1/20/2020       | 1/20/2020             | 32 | M | 1/25/2020 | 101st case in Shenzhen |
| Shenzhen | 34         | M       | 1/20/2020       | 1/20/2020             | 34 | M | 1/26/2020 | 102nd case in Shenzhen |
| Shenzhen | 64         | M       | 1/17/2020       | 1/18/2020             | 37 | M | 1/24/2020 | 169th case in Shenzhen |
| Shenzhen | 78         | M       | 1/16/2020       | 1/26/2020             | 78 | F | 1/30/2020 | 283rd case in Shenzhen |
| Shenzhen | 59, 61     | F, M    | 1/21/2020       | 1/24/2020             | 34 | F | 1/25/2020 | 253rd case in Shenzhen |
| Shenzhen | 50         | F       | Local infection | 1/26/2020             | 37 | F | 2/5/2020  | 354th case in Shenzhen |
| Shenzhen | 42         | M       | Local infection | 1/20/2020             | 6  | M | 2/6/2020  | 340th case in Shenzhen |
| Shenzhen | 69         | M       | Local infection | 1/21/2020             | 66 | F | 2/2/2020  | 335th case in Shenzhen |
| Shenzhen | 69         | M       | Local infection | 2/9/2020              | 69 | F | 2/10/2020 | 402nd case in Shenzhen |
| Shenzhen | 69         | M       | Local infection | 2/9/2020              | 49 | M | 2/10/2020 | 397th case in Shenzhen |

**Supplementary Table 9. Population age distribution in Wuhan**

| <b>Age</b>   | <b>Nationwide Census 2010*</b> | <b>Proportion 2010</b> | <b>Household Survey 2017**</b> | <b>Proportion 2017</b> |
|--------------|--------------------------------|------------------------|--------------------------------|------------------------|
| 0-9          | 655178                         | 6.7%                   | 862676                         | 10.1%                  |
| 10-19        | 1193294                        | 12.2%                  | 588047                         | 6.9%                   |
| 20-29        | 2279487                        | 23.3%                  | 1241695                        | 14.5%                  |
| 30-39        | 1486647                        | 15.2%                  | 1479178                        | 17.3%                  |
| 40-49        | 1668609                        | 17.1%                  | 1313647                        | 15.4%                  |
| 50-59        | 1261163                        | 12.9%                  | 1262768                        | 14.8%                  |
| 60-69        | 718296                         | 7.3%                   | 1069800                        | 12.5%                  |
| 70-79        | 391084                         | 4.0%                   | 481999                         | 5.6%                   |
| 80+          | 131630                         | 1.3%                   | 236707                         | 2.8%                   |
| <b>Total</b> | <b>9785388</b>                 | <b>100.0%</b>          | <b>8536517</b>                 | <b>100.0%</b>          |

\*Nationwide Population Census included residents who had lived in Wuhan for at least 6 months prior to the Census.

\*\*Household Survey only included residents whose household registrations (Hukou) were in Wuhan during the Survey. These residents might not live in Wuhan while the Survey was conducted.
